# Supplementary material
Source: PubMed Central journal article supplement (PMC6703989)
Supplement: supp_7.3.E524_2018-0191-1-at.pdf [file supp_7.3.E524_2018-0191-1-at.pdf]

## Appendix 1 (as supplied by the authors): Search strategy detail

**Database:** Ovid MEDLINE(R) and Epub Ahead of Print, In-Process & Other Non-Indexed Citations and Daily 1946 to March 29, 2019

**Date:** 31 March, 2019

**Search:**

1. exp immunization/or exp immunization programs/ or exp vaccines/ or (vaccin\* or inocul\* or immunis\* or immuniz\*).mp. (577 485)
2. exp child care/or exp students/or Schools/or Child Day Care Centers/or (school or daycare or day care or child care or nursery school or pre-school or preschool or kindergarten or primary school or elementary school or junior high or middle school or high school).ti. (230 218)
3. Mandatory Programs/or Public Policy/or Health Policy/or Legislation as Topic/or Government regulation/or Guidelines as Topic/or Guideline Adherence/or (law\* or regulat\* or legal\* or legislat\* or polic\* or mandat\* or requir\* or compliance or uptake or enforc\* or compulsory or govern\*).mp. (4 898 915)
4. 1 and 2 and 3

**Results:** 1258

**Database:** CINAHL (Cumulative Index to Nursing and Allied Health Literature) Complete (EBSCOhost)

**Date:** 2019-03-04

**Search:**

1. (vaccin\* OR inocul\* OR immunis\* OR immuniz\*) OR MH "Immunization+" OR MH "Vaccines+"  
AND
2. (law\* OR regulat\* OR legal\* OR polic\* OR mandate\* OR requir\* OR compliance OR uptake OR enforce\* OR compulsory) OR MH "Jurisprudence" OR MH "Public Policy+" OR MH "Legislation"  
AND
3. (school\* OR college\* OR universit\* OR postsecondar\* OR day-care\* or day care\* OR daycare\*) OR MH "Schools+" OR MH "School Health Services" OR MH "Child Day Care"

Limit to Academic Journals or Dissertations

**Results:** 869

**Database:** EconLit (EBSCOhost)

**Date:** 2019-03-08

**Search:**

1. (school\* OR day-care\* OR day care\* OR daycare\*)  
AND
2. (vaccin\* OR inocul\* OR immunis\* OR immuniz\*)

**Results:** 159

**Database:** EMBASE 1974 to 2019 March 07 (Ovid)

**Date:** 2019-03-08

1. exp immunization/ OR exp Vaccine/
2. (law\* or regulat\* or legal\* or polic\* or mandate\* or requir\* or compulsory).mp. or Mandatory Program/ or Voluntary Program/ or Policy/ or Health Care Policy/ or Law/
3. exp School/ or School Health Service/ or Day Care/
4. 1 AND 2 AND 3

**Results:** 1465

**Database:** Education Resources Information Center (ERIC) (EBSCOhost)

**Date:** 2019-03-08

**Search:**

1. ((vaccin\* OR inocul\* OR immunis\* OR immuniz\*) OR (SU.EXACT("Immunization Programs")))  
AND
2. (law\* OR regulat\* OR legal\* OR polic\* OR mandate\* OR requir\* OR compliance OR uptake OR enforce\* OR compulsory) OR SU.EXACT("School Law") OR SU.EXACT("Laws") OR SU.EXACT("Legislation") OR SU.EXACT("Health Programs") OR SU.EXACT("Public Policy")  
AND
3. (school\* OR day-care\* or day care\* OR daycare\*) OR SU.EXACT.EXPLODE("Schools")OR SU.EXACT("Child Care Centers")

**Results:** 355

**Database:** PAIS Index (PAIS International and PAIS Archive) (ProQuest)

**Search:**

1. (school\* OR day-care\* OR day care\* OR daycare\*)  
AND
2. SU.EXACT("Vaccination and Vaccines")  
AND
3. (law\* OR regulat\* OR legal\* OR mandate\* OR requir\* OR compulsory) OR SU.EXACT("Legislation") OR SU.EXACT("Compulsory Participation") OR SU.EXACT("Law") OR SU.EXACT("Regulation")

**Results:** 126

*The following databases were also searched preliminarily, but due to lack of relevant, includable results were not included in the review: Campbell Collaboration, Cochrane Databases of Systematic Reviews, EPPI-Centre: DoPHER, Networked Digital Library of Theses and Dissertations (NDLTD), Proquest Dissertation and Theses Global, World Political Science Abstracts.*
