# Supplementary material
Source: PubMed Central journal article supplement (PMC6703989)
Supplement: supp_7.3.E524_2018-0191-2-at.pdf [file supp_7.3.E524_2018-0191-2-at.pdf]

## Appendix 2 (as supplied by the authors): Data extraction fields

### Publication Metadata Summary

- M1. Lead author
- M2. Date of publication
- M3. Title
- M4. What does the study do?

### Mandate Policy Attributes

- QP1. When was this policy implemented (year)?
- QP2. Is this a new mandate or a modification of a previous mandate?
  - a. New
  - b. Modification to add vaccine(s)
  - c. Modification to change exemption procedures
  - d. Modification of other type:
  - e. [blank field to allow for input of other]
- QP3. What vaccine(s) are regulated by the policy?
  - a. All recommended
  - b. HepB
  - c. Hib
  - d. HPV
  - e. Influenza
  - f. Meningococcal (any)
  - g. Measles only
  - h. MMR
  - i. Pneumococcal
  - j. Polio
  - k. Rotavirus
  - l. Tdap/DTaP
  - m. Varicella
  - n. Other
  - o. [blank field to allow for input of other]
- QP4. What population is targeted by the policy?
  - a. Day Care Students (pre-K)
  - b. K-12 Students
  - c. Postsecondary
  - d. Other
  - e. [blank field to allow for input of other]
- QP5. Who is the administrator of the policy?
  - a. Federal Government
  - b. Provincial/State Government
  - c. Regional Health Entity
  - d. School
  - e. Other
  - f. [blank field to allow for input of other]
- QP6. For whom are there consequences if the policy is not complied with/met?
  - a. Government Body
  - b. School
  - c. Parents
  - d. No one
  - e. Other

- f. [blank field to allow for input of other]
- QP7. What type of consequences are applied for non-compliance?
- Financial
  - Legal
  - School/daycare conditional enrolment
  - School/daycare enrolment banned
  - Other
  - [blank field to allow for input of other]
- QP8. Are there exemptions allowed from the policy?
- No
  - Yes – unspecified
  - Yes – medical
  - Yes – religious
  - Yes – philosophical
  - Yes – for homeless/military/transient populations
  - Yes – other:
  - [blank field to allow for input of other]
- QP9. What is needed for exemption?
- Self-report
  - Authorization: non-medical
  - Authorization: health professional
  - Education
  - Nothing
  - Other
  - [blank field to allow for input of other]
- QP10. Who has the power to authorize exemptions?
- Governmental body
  - School
  - Doctor
  - Other
  - [blank field to allow for input of other]
- QP11. How often to exemptions need to be resubmitted/reauthorized?
- Never
  - Annually
  - Other
  - [blank field to allow for input of other]
- QP12. Did immunization rates rise following implementation of this policy?
- No
  - Inconclusive
  - Yes
  - Other
  - [blank field to allow for input of other]
- QP13. What other measures were implemented with this policy?
- Improved immunization coverage (e.g., free, reduced cost vaccines)
  - Improved immunization access (e.g., additional clinics, providers)
  - Other
  - [blank field to allow for input of other]
  - None known
- QP14. Has Other Research Been Done on the Policy?
- Yes
  - None known

Study Attributes

## RQ1. Lead author

- a. Institution
- b. Country
- c. Discipline (of primary appointment)

## RQ2. Research Method

- a. Quant: Survey/Questionnaire
- b. Quant: Descriptive statistical methods (e.g., simple associations)
- c. Quant: Time series
- d. Quant: Before/after (with or without control)
- e. Quant: RCT
- f. Quant: statistical regression analysis (any type)
- g. Qual: Interviews
- h. Qual: Focus groups
- i. Qual: ethnographic
- j. Mixed-methods
- k. Other
- l. [blank field to allow for input of other]

## RQ3. Study funding type

- a. Public
- b. Private foundation
- c. Industry
- d. No funding
- e. Other:
- f. [blank field to allow for input of other]

## RQ4. Major findings

[text box for brief free response]

## RQ5. Major limitations/biases

[text box for brief free response]
