# Supplementary material
Source: PubMed Central journal article supplement (PMC6703989)
Supplement: supp_7.3.E524_2018-0191-original-submission.pdf [file supp_7.3.E524_2018-0191-original-submission.pdf]

**Title:**

Do school or daycare vaccine mandates increase pediatric vaccination coverage?

A systematic review

**Authors:**

Devon Greyson, PhD MLIS<sup>1,2</sup>; Chris Vriesma-Magnuson MLIS<sup>3</sup>, Julie A. Bettinger, PhD MPH<sup>2</sup>

<sup>1</sup>Department of Communication, University of Massachusetts Amherst, Massachusetts, USA

<sup>2</sup>Vaccine Evaluation Center, British Columbia Children's Hospital Research Institute, and

Department of Pediatrics, University of British Columbia, Vancouver, Canada

<sup>3</sup>School of Library, Archival and Information Studies, University of British Columbia,

Vancouver, Canada

**Corresponding Author Contact:**

Department of Communication

650 N. Pleasant St.

University of Massachusetts Amherst

Amherst, MA 01003-1100 USA

413-545-6322

dgreyson@umass.edu

**Funding Statement:**

Funding for this study was provided by the British Columbia Immunization Committee. JAB is

supported by a Michael Smith Foundation for Health Research Scholar Award. DG was

1  
2  
3 supported for the duration of this study by a Michael Smith Foundation for Health Research  
4  
5 Trainee Award.  
6

7  
8 **Declaration of Competing Interests:**  
9

10 The authors declare no competing interests.  
11  
12  
13  
14  
15  
16  
17  
18  
19  
20  
21  
22  
23  
24  
25  
26  
27  
28  
29  
30  
31  
32  
33  
34  
35  
36  
37  
38  
39  
40  
41  
42  
43  
44  
45  
46  
47  
48  
49  
50  
51  
52  
53  
54  
55  
56  
57  
58  
59  
60

Confidential

1  
2  
3 Do school or daycare vaccine mandates increase pediatric vaccination coverage?  
4  
5 A systematic review  
6  
7  
8  
9

10  
11 **Abstract**  
12

13 **Background:** School or daycare vaccination mandates are present in two Canadian provinces,  
14 every US state, and are a growing strategy internationally in wealthy countries. However, the  
15 effectiveness of such laws for increasing population-level vaccine coverage is unclear.  
16  
17

18  
19  
20 **Methods:** MEDLINE, EMBASE, CINAHL, ERIC, Cochrane Database of Systematic Reviews,  
21 PAIS, and WPSA were searched for peer-reviewed empirical studies of school or daycare  
22 vaccine mandate policies published 1980-2017. Reference lists of relevant articles were also  
23 searched. Included studies were too heterogeneous for meta-analysis, thus data were extracted  
24 using a standardized rubric, and results narratively synthesized.  
25  
26  
27

28  
29  
30 **Results:** Eight studies met inclusion criteria. Seven were conducted using data from one or more  
31 US state and 1 an Australian state. One was a prospective cohort study, 5 were retrospective  
32 cohort studies, and 2 were retrospective analyses of survey data. Data sources included the US  
33 National Immunization Survey-Teen, school databases, state registries, and a clinical data  
34 repository. Findings were varied. Three studies found no increase in vaccine coverage following  
35 adolescent vaccine mandates, with HPV appearing particularly resistant to mandate efforts. Five  
36 studies showed increases in vaccination that might be attributable, at least in part, to vaccination  
37 or documentation mandates, although four of these had data that did not include all children.  
38  
39  
40  
41  
42  
43

44  
45 **Interpretation:** Although numerous studies have explored impacts of childhood vaccine  
46 mandates, the evidence regarding whether mandates are an effective intervention to increase  
47 population vaccine coverage remains inconclusive. Context-sensitive prospective studies with  
48 whole-population registry data and appropriate comparators are required.  
49  
50  
51

52  
53 **Abbreviations**  
54  
55  
56  
57  
58  
59  
60

1  
2  
3  
4  
5  
6  
7  
8  
9  
10  
11  
12  
13  
14  
15  
16  
17  
18  
19  
20  
21  
22  
23  
24  
25  
26  
27  
28  
29  
30  
31  
32  
33  
34  
35  
36  
37  
38  
39  
40  
41  
42  
43  
44  
45  
46  
47  
48  
49  
50  
51  
52  
53  
54  
55  
56  
57  
58  
59  
60

HBV – Hepatitis B vaccine

HPV – Human papilloma virus vaccine

MCV4 – Meningococcal vaccine against 4 strains (ACWY)

OECD – Organisation for Economic Co-operation and Development

PRISMA – Preferred Reporting Items for Systematic Reviews and Meta-Analyses

TDaP – Tetanus, diphtheria, and acellular pertussis vaccine

Confidential

## Introduction

A broad range of policy levers exist to encourage childhood vaccination. These range in nature and intrusiveness, from efforts to increase easy access to vaccination services to policies requiring vaccination under certain circumstances. Vaccine mandates for school or childcare attendance are ubiquitous in the USA and growing as a strategy in Europe and Australia. Currently, school vaccine mandate legislation exists in two Canadian provinces, Ontario (1) and New Brunswick (2). Mandate policies vary in what they require and in restrictiveness (3). Such policies might require, for example: documentation of immunization status so that vulnerable individuals may be identified in an outbreak, documentation of immunization status plus additional documentation to verify that non-vaccination is intentional, documentation of immunization status and required completion of vaccine education to verify that non-vaccination was an educated choice, or mandated immunization with limited exceptions (e.g, for medical reasons, religious reasons). Mandates may be incentivized with benefits (e.g., financial rewards) for those who comply, and/or consequences (e.g., fines, exclusion) for those who do not.

In 2015, at the 148th Annual Meeting, the CMA passed a resolution recommending documentation-with-education mandates, such "that governments authorize elementary and secondary schools to require a declaration of immunization status, to be followed by a conversation between public health officials and parents where children are shown to be inadequately immunized."(4) However, such policies have not at this time been adopted by the majority of Canadian provinces. Debate regarding best practices for mandate policies tends to draw largely on ethical arguments (5) regarding the optimal legislation for maximum vaccine coverage of school children without violating parental civil liberties, with some voices advocating strict policies with few permitted exemptions, others favoring a more libertarian approach, and many aiming to strike an acceptable balance (6). Often in these debates, the effectiveness of vaccination mandate laws in increasing population vaccine coverage is assumed. However, despite the existence of thousands of articles on the topic of mandate policies, a thorough and focused synthesis of the available literature has not occurred.

Our aim in this analysis is to inform the ongoing debates regarding optimal childhood vaccination policy by systematically identifying and synthesizing the existing evidence to answer

1  
2  
3 the question: *Does the implementation of school or daycare-based childhood vaccine mandate*  
4 *policies cause an increase in vaccination coverage?* In order to assess effectiveness of child  
5 vaccine mandates in real-life settings, studies with the appropriate outcome must be examined.  
6 Several cross-sectional studies have documented associations between existence of a child  
7 vaccination mandate (or difficulty of exemption from a mandate) and population vaccine  
8 coverage outcomes, suggesting that stricter policies around exemptions from mandates may  
9 increase compliance (7–10). These studies alone, however, cannot determine causality or  
10 directionality of the association. Other studies have explored the influence of mandates on  
11 outcomes such as exemption rate (11,12) or disease occurrence (13), without population  
12 vaccination data. A recent systematic review conducted by the United States Government  
13 attempted to synthesize findings of all research since 1980 on school vaccine mandates (14);  
14 however a review with more stringent inclusion criteria, which is focused on the actual effects of  
15 mandate implementation/changes, is merited to assess causality and inform jurisdictions that do  
16 not already have mandates in place. Population level vaccine coverage is the ideal outcome for  
17 implementation studies of vaccine mandates, since exemption rates may overlook unintended  
18 consequences such as clustering of unvaccinated children in private or home schooling not  
19 subject to mandates, and vaccine-preventable disease incidence is affected by many forces  
20 including temporal trends in outbreak cycles.  
21  
22  
23  
24  
25  
26  
27  
28  
29  
30  
31  
32  
33

## 34 35 **Methods**

36  
37  
38 This systematic review was conducted according to PRISMA guidelines (15). No protocol was  
39 registered for this non-clinical review of public health policy interventions. We sought English,  
40 French, or Spanish language studies published in 1980 or later using any empirical method to  
41 obtain evidence on potential causal effects of implementation of school or childcare vaccination  
42 mandate policies for children on the outcome of childhood vaccination coverage in the  
43 population. Appropriate comparison groups included same-time comparators in locations without  
44 mandate changes or pre/post intervention comparisons. Studies that focused only on the policy of  
45 a specific school rather than a regional/government policy were excluded, as were mandates for  
46 non-pediatric populations, policies that only imposed mandates in cases of outbreaks, non-  
47 empirical papers (e.g., theory, commentary, projected modeling), and studies that only examined  
48  
49  
50  
51  
52  
53  
54  
55  
56  
57  
58  
59  
60

1  
2  
3 outcomes other than population immunization or vaccine coverage (e.g., exemption rate only,  
4 hypothetical choice experiments). Figure 1 summarizes inclusion and exclusion criteria.  
5  
6

7  
8 [--Figure 1. Inclusion and Exclusion Criteria about here--]  
9

10 We searched the databases MEDLINE, EMBASE, CINAHL, the Cochrane Database of  
11 Systematic Reviews, ERIC (Education Resources Information Center), PAIS (Public Affairs  
12 Information Service), and WPSA (Worldwide Political Science Abstracts) in August 2016 and  
13 again to update in October 2017, in order to identify potentially-relevant articles (see Appendix  
14 A for full search details). References of relevant articles were searched for additional potentially-  
15 includable citations, and a Google Scholar alert was set to help identify new articles published  
16 during analysis and writing.  
17  
18

19 Titles and abstracts of initially gathered citations were first screened by a single author (CVM)  
20 for relevance. Full texts of potentially-includable articles were obtained and all three authors  
21 (DG, JAB, CVM) reviewed for inclusion or exclusion. Discrepancies were resolved by  
22 discussion among the authors to reach consensus. Included articles were then subjected to a data  
23 extraction process by all authors (see Appendix B for all characteristics for which data was  
24 extracted), discussed by all authors, and synthesized in a narrative manner. All included studies  
25 were also assessed normatively for potential bias in study methods by two authors (JAB, DG)  
26 using the bias categories from the ROBINS-I (Risk Of Bias In Non-randomised Studies - of  
27 Interventions) tool (16).  
28  
29  
30  
31  
32  
33  
34  
35  
36  
37  
38  
39

## 40 41 **Results**

42 Database searches resulted in 2022 unique citations to screen and assess for eligibility, and  
43 reference lists of key articles on the topic revealed 5 additional studies. After screening for  
44 relevance and applying inclusion and exclusion criteria, 8 studies were selected for inclusion in  
45 this review (see Figure 1).  
46  
47  
48  
49

50  
51 [--Figure 2. PRISMA Flow Diagram about here--]  
52  
53  
54  
55  
56  
57  
58  
59  
60

1  
2  
3 Of the 8 included studies, 7 were conducted using data from one or more US states, and 1  
4 focused on an Australian state. One was a prospective cohort study, 5 were retrospective cohort  
5 studies, and 2 retrospective analyses of vaccination coverage survey data. Data sources included  
6 various iterations of the US National Immunization Survey-Teen (NIS-Teen), school vaccination  
7 documentation databases, state vaccination registries, and a clinical data repository from a  
8 university health system.  
9

10  
11  
12 The American studies assessed policies mandating adolescent vaccination (typically 5<sup>th</sup> or 6<sup>th</sup>  
13 grade level, 10-12 years of age), kindergarten-entrant vaccination (typically age 4-5 years), and  
14 parental education mandates (requiring education regarding certain vaccines for parents of  
15 adolescents). These policies had various exemption procedures, and while most examined the  
16 impact of the addition of new vaccine or education requirements, one looked at the impact of a  
17 change in exemption procedures. The Australian study focused on a school entry  
18 (kindergarten/grade 1, age 4-6 years) policy requiring parents to submit documentation of  
19 immunization.  
20  
21

22  
23 In the American studies, coverage was assessed among adolescents for the following vaccines:  
24 hepatitis B (HBV), human papillomavirus (HPV)(girls only), meningococcal A/C/W/Y vaccine  
25 (MCV4), tetanus containing vaccines (e.g., Tdap), varicella, or “all required vaccines,” while  
26 the Australian school entry study assessed rates of “fully immunized” students in the preparatory  
27 year through grade 2. Table 1 summarizes the included studies’ methods, relevant findings, and  
28 limitations (including risks of bias).  
29  
30

31  
32  
33  
34  
35  
36  
37  
38  
39  
40  
41 [ --Table 1. Included Studies--]  
42  
43

#### 44 **Findings of Included Studies**

45  
46 Findings of the included studies were varied, and the heterogeneity of study methods, data  
47 sources, populations, and unit of analysis precluded statistical meta-analysis. Thus, we report  
48 here a narrative synthesis of findings of the included studies, grouped by those that did not, and  
49 those that did, find an increase in coverage following implementation of a mandate policy..  
50  
51

#### 52 ***Studies that showed no increase in coverage after mandates***



1  
2  
3 Three included studies used survey or health system data and found no increase in vaccine  
4 coverage following adolescent vaccine mandates that were implemented over the 2007-2009  
5 time frame. Bugenske and colleagues (17) used NIS-Teen telephone survey data to examine  
6 whether states that implemented middle-school vaccine requirements in 2008-09 experienced a  
7 larger change in coverage than states that already had a mandate prior to 2008 or those with no  
8 mandate in 2008-09. While states with existing or new mandates were associated with higher  
9 coverage rates of both Tdap and MCV4 than states with no mandates, all states in the analysis  
10 saw increases in coverage from 2008 to 2009, with overlapping confidence intervals among  
11 almost all of the groups. This pattern did not hold with HPV; however, only one state included in  
12 the analysis had an HPV vaccine mandate in 2008-09, and this was associated with a possible  
13 (statistically-insignificant) decrease in coverage upon implementation of a mandate policy, as  
14 compared with comparatively small but statistically significant increase in states with solely  
15 education mandates or no mandates.  
16  
17  
18  
19  
20  
21  
22  
23  
24  
25

26  
27 HPV appeared particularly resistant to mandate efforts in other studies as well, both when  
28 examining within a jurisdiction before and after a mandate went into effect, and when comparing  
29 coverage uptake over time in jurisdictions with different policies. Perkins and colleagues (18)  
30 used NIS-Teen data 2009-2013 to conduct a contemporaneous comparison of HPV coverage  
31 among girls in two jurisdictions (one state and the District of Columbia) with vaccine mandates,  
32 10 states with education mandates, and states without HPV mandates. All mandates for  
33 vaccination or education were implemented in 2007 or 2008. The authors found no difference in  
34 coverage in states with and without vaccine or education mandates. Cuff et al. (19) examined the  
35 VA state HPV mandate specifically, using clinical data from University of Virginia-supported  
36 medical practices in 2014 (five years post-mandate), and comparing this to pre-mandate data  
37 from 2008, found no effect on HPV coverage.  
38  
39  
40  
41  
42  
43  
44  
45  
46

### 47 ***Studies showing increase in coverage following mandates***

48  
49

50 Two included studies used registries of school-enrolled children and found increases in  
51 vaccination among regional or state student populations following mandate policies: one in the  
52 1990's in Chicago, another in 2009-2010 in Michigan. A third using a similar registry in  
53 Washington state found no decrease in vaccine coverage, and an increase in students who were  
54  
55  
56  
57  
58  
59  
60

1  
2  
3 up-to-date for all vaccines, following imposition of stricter mandate exemption procedures. One  
4 study using the Arizona state vaccine registry, which is based on immunizer reporting rather than  
5 school enrollment data, found an increase in coverage following a mandate. The final study in  
6 this group, conducted in Victoria, Australia in the 1990's, found that implementation of a  
7 documentation mandate increased documentation of both vaccinated and unvaccinated students.  
8  
9

10  
11  
12  
13 Morita and colleagues (20) used data from the Chicago public school system to retrospectively  
14 look at HBV vaccine coverage by grade 12 (age 17-18 years) over a six-year span in the 1990's  
15 during which a 5<sup>th</sup> grade mandate policy for HBV vaccination was implemented. They found that  
16 post-mandate cohorts had much higher coverage of HBV. Similarly, Potter et al. (21)  
17 retrospectively used the Michigan state immunization registry of school-enrolled children to  
18 assess the impact of a new 6<sup>th</sup> grade mandate for adolescent TDaP, MCV4, and varicella, finding  
19 that vaccine completion was higher in the post-mandate year (2010) compared with the previous  
20 year (2009) and time to completion was shorter.  
21  
22  
23  
24  
25  
26  
27

28 Omer and colleagues (22) examined a policy that changed exemption procedures, rather than  
29 vaccines required for school enrollment. Using Washington state health data for kindergarten  
30 enrollment from 1997-98 through 2013-14, the authors found that after addition of the  
31 requirement to have a health care provider counsel/sign a form in order to exempt a child from  
32 the state vaccine mandate, there was a small increase in students who were complete for all  
33 vaccines. With access to population data for vaccines administered in the state of Arizona to  
34 children under 18 years, Simpson et al. (23) were able to track coverage of MCV4 vaccination  
35 among 11 and 12 year old children before and after implementation of the 2008 state  
36 requirement for students to be vaccinated before 6<sup>th</sup> grade entry. Simpson found that MCV4  
37 coverage by Sept 1 among 12-year-olds increased after the mandate.  
38  
39  
40  
41  
42  
43  
44  
45

46 The one Australian study that was included in this analysis, by Thompson and colleagues (24),  
47 used state administrative data (education census) before and after a documentation mandate was  
48 imposed, finding a small increase in submitted documentation for incoming primary  
49 (kindergarten) students following implementation of a documentation mandate policy. This  
50 included a small increase in documentation of fully vaccinated students and a larger increase in  
51 documentation of incompletely vaccinated students.  
52  
53  
54  
55  
56  
57  
58  
59  
60

## Interpretation

Research on whether the implementation of school or childcare based vaccine mandate policies cause an increase in vaccination coverage among children provide mixed evidence. Overall, studies using school enrollee data appeared to find increases in vaccination after mandates were implemented or tightened, while those using survey or health system data and those looking at HPV mandates, did not. In the included studies, while implementing a mandate for vaccine coverage was often associated with higher vaccination coverage among school-enrolled children, the causal effects of such mandates on population vaccine coverage were unclear.

Based on the evidence to date, it remains an open question whether implementation of childhood school- or daycare-based vaccine or documentation mandates increase vaccination coverage in a population. In several studies, there appeared to be a possible positive impact on vaccine coverage, while in others there appeared to be no impact. Context, which was rarely fully described in the included articles, may play an important role in the success or failure of such mandate policies. For example, while Simpson and colleagues found an increase in MCV4 coverage following implementation of a mandate, the exact contribution of the mandate—as compared with an increase following Advisory Committee on Immunization Practices (ACIP) recommendation changes in 2005 and 2007, and concurrent interventions such as an educational campaign and provider behavior changes—was not possible to reliably ascertain with these data alone. Similarly, the increase in students with up-to-date immunization status observed by Omer et al. (22) may have been influenced by the restrictions on mandate exemptions, but also potentially by changes in state vaccine purchasing and provider reimbursement, community vaccine promotion activities, retraction of the infamous Wakefield study from Lancet, and changes to the vaccine schedule as well as the exemption form. The particular lack of success of the HPV mandates studied in this body of research may relate to the highly charged political discourse surrounding the introduction of that particular vaccine (25).

While the limitations of the included studies were not uncommon within the research context, study conclusions often glossed over such limitations, overstating the findings regarding intervention effectiveness. This was primarily due to two main issues, both of which may be remedied with additional high-quality future research. First, many of these studies, including all

1  
2  
3 but one of those with positive results, relied on data gathered from school-enrollees. This data  
4 may be more accurate than that gathered from a survey such as NIS-Teen; however, using  
5 school-level data to evaluate a state-level policy does carry several limitations related to the  
6 sample. Key among these is the issue of missing data. In several of these studies, home learners,  
7 private school enrollees, and those who simply did not comply with documentation requirements  
8 were omitted from the analysis. The population of compliant, public school-enrolled children,  
9 however, may not be an appropriate proxy for the whole school-aged population of a city,  
10 district, or state. Lack of measurement of whose data are missing, and where they spend their  
11 time, risks overlooking potentially-dangerous clustering of unvaccinated populations who are  
12 vulnerable to disease outbreaks. While not all included studies showed an increase in vaccine  
13 coverage after mandate imposition/tightening, many did. Unfortunately, those that did often  
14 noted an accompanying increase in exemptions or missing/incomplete data, which raises  
15 questions regarding whether these improved coverage rates may, at least in part, reflect  
16 reclassification or exclusion of out-of-compliance children, rather than any true increase in  
17 population vaccine coverage and also may be hinting at a shifting or clustering of unvaccinated  
18 populations.  
19  
20  
21  
22  
23  
24  
25  
26  
27  
28  
29  
30

31  
32 Second, as with most implementation science that uses natural policy experiments, the studies in  
33 this body of research are vulnerable to secular trends and ecological fallacies. Few studies  
34 adequately measured pre- and post-intervention periods, included appropriate comparator  
35 jurisdictions, or fully considered factors external to the vaccine mandate policies that may have  
36 influenced vaccination rates. Some factors that may have confounded findings of studies such as  
37 those reviewed in this study include (but are not limited to): outbreaks of vaccine-preventable  
38 disease, the retraction of Andrew Wakefield's notorious Lancet paper, growing population  
39 familiarity with and corresponding acceptance of newer vaccines over time (e.g., HBV,  
40 varicella), changes in data source (e.g., starting of a new state registry), immunization promotion  
41 efforts or access improvements that may accompany a mandate policy without being officially  
42 part of the policy, improved immunization documentation being misinterpreted as increased  
43 coverage, new availability of vaccines for a given age group (e.g., Tdap for adolescents), media-  
44 popularized fears about specific vaccines (e.g., HPV), and growing popularity of home learning  
45 in the USA.  
46  
47  
48  
49  
50  
51  
52  
53  
54  
55  
56  
57  
58  
59  
60

1  
2  
3 To better understand the effectiveness of mandates, comparisons between school enrollment and  
4 whole population/representative samples should be conducted. Simpson (23) contrasts results  
5 calculated from census data versus state immunization registry data, and finds very different  
6 coverage rates estimated using these different population data sources. Additionally, more  
7 studies on the impact of HPV mandates should be conducted now that the vaccine is universally  
8 recommended to all genders, to assess whether it remains resistant to mandate policies. Vaccine  
9 researchers should also be encouraged to consult with local and regional immunization program  
10 managers and to work with social scientists to better understand the impact of potentially-  
11 confounding contemporaneous interventions (e.g., those that affect access to vaccination) as well  
12 as other ecological factors (e.g., outbreaks, media scares about adverse events) that might affect  
13 policy effectiveness.  
14  
15  
16  
17  
18  
19  
20  
21  
22

23 Future studies of immunization documentation mandates should also explore population  
24 immunization coverage outcomes. Other Australian studies (26,27) not eligible for inclusion in  
25 this review have also found that documentation mandates appear to increase student  
26 immunization documentation, potentially enabling better identification of at-risk children in the  
27 case of an outbreak. However they did not measure any potential immunization coverage  
28 changes in the population, although this is commonly one of the stated objectives of such  
29 policies. Further, since childcare and preschool are not mandatory, restricting access risks  
30 increasing population inequities related to early child education and development without  
31 increasing vaccine coverage.  
32  
33  
34  
35  
36  
37  
38  
39

40 Much recent attention has been paid to issues of mandate exemptions and “opting out”  
41 considerations in terms of political (28) and ethical implications (29), as well as impacts on  
42 exemption rates (30) and ultimately vaccine confidence and coverage impacts (31). Less  
43 attention has been paid to the question of whether mandates themselves are an effective tool for  
44 increasing vaccination in pediatric populations. This may be due to the fact that the vast majority  
45 of childhood vaccine mandate policy research focuses on US jurisdictions, where mandates are  
46 already in place. Removing an established mandate has not to our knowledge been studied, and  
47 certainly raises concerns regarding stoking vaccine hesitancy. However, as policy makers in  
48 Canada, as well as other countries, increasingly discuss and implement vaccine mandates for  
49 school (32,33) or childcare (34) attendance, broader questions of whether mandates are indeed  
50  
51  
52  
53  
54  
55  
56  
57  
58  
59  
60

1  
2  
3 effective policy levers for increasing population vaccination are important on a global scale.  
4 Concerns raised regarding, for example, potential ‘backfire effects’ of increasing resistance,  
5 clustering unvaccinated children, weakening trust in the government and health professionals, or  
6 diversion of resources away from addressing structural barriers to vaccine access (35–38) should  
7 be taken seriously—particularly given that, while implementation of a mandate may or may not  
8 increase coverage, removal or weakening of an existing mandate may decay vaccine confidence  
9 (12). If it is the case that an improved system of vaccine documentation and prompting is the  
10 main effect of most vaccine mandates, population vaccination registries may achieve the same  
11 effect with a much lower risk of increased resistance and clustering. In order to answer the  
12 question of whether mandates are an effective immunization promotion strategy for a country  
13 such as Canada, further research—context-sensitive prospective studies with whole-population  
14 registry data and appropriate comparators both temporal and contemporaneous—is required.

## 25 **Conclusions**

26  
27 Although numerous studies have attempted to assess whether childhood vaccine mandates  
28 increase population vaccination coverage, the evidence remains uncertain. Future studies  
29 investigating this question may prove more conclusive if they are able to use whole-population  
30 data, triangulate data sources, include sufficient temporal and contemporaneous comparators,  
31 and more fulsomely take into account environmental confounders. At this time, the evidence  
32 cannot support either a recommendation for or against implementing vaccine mandate policies  
33 for children’s attendance in school or daycare programs.

## 43 **References**

- 44 1. Province of Ontario. Immunization of School Pupils Act, R.S.O. 1990, c. I.1 [Internet].  
45 Available from: <http://www.ontario.ca/laws/view>
- 46 2. Government of New Brunswick. Public Health Act (S.N.B. 1998, c. P-22.4). [Internet].  
47 1998. Available from: <https://www.ecolex.org/details/legislation/public-health-act-snb-1998-c-p-224-lex-faoc095727/>
- 48 3. Attwell K, Navin MC, Lopalco PL, Jestin C, Reiter S, Omer SB. Recent vaccine mandates  
49 in the United States, Europe and Australia: A comparative study. Vaccine [Internet]. 2018  
50  
51  
52  
53

Oct 15 [cited 2018 Oct 22]; Available from:  
<http://www.sciencedirect.com/science/article/pii/S0264410X18313719>

4. Canadian Medical Association. Policy resolution GC15-C27 - Declaration of immunization status [Internet]. 2015 [cited 2015 Dec 18]. Available from: [http://policybase.cma.ca/dbtw-wpd/exec/dbtwpub.dll?AC=GET\\_RECORD&XC=/dbtw-wpd/exec/dbtwpub.dll&BU=http%3A%2F%2Fpolicybase.cma.ca%2Fdbtw-wpd%2FCMAPolicy%2FPublicA.htm&TN=PubPol&SN=AUTO30465&SE=2624&RN=13&MR=20&TR=0&TX=1000&ES=0&CS=1&XP=&RF=Public%3E+TableDE&EF=&DF=Display%3E+English&RL=0&EL=0&DL=1&NP=3&ID=&MF=wpengmsgcmapolicypublicA.ini&MQ=&TI=0&DT=&ST=0&IR=1993&NR=0&NB=0&SV=0&SS=0&BG=&FG=000000&QS=Staff&OEX=ISO-8859-1&OEH=ISO-8859-1](http://policybase.cma.ca/dbtw-wpd/exec/dbtwpub.dll?AC=GET_RECORD&XC=/dbtw-wpd/exec/dbtwpub.dll&BU=http%3A%2F%2Fpolicybase.cma.ca%2Fdbtw-wpd%2FCMAPolicy%2FPublicA.htm&TN=PubPol&SN=AUTO30465&SE=2624&RN=13&MR=20&TR=0&TX=1000&ES=0&CS=1&XP=&RF=Public%3E+TableDE&EF=&DF=Display%3E+English&RL=0&EL=0&DL=1&NP=3&ID=&MF=wpengmsgcmapolicypublicA.ini&MQ=&TI=0&DT=&ST=0&IR=1993&NR=0&NB=0&SV=0&SS=0&BG=&FG=000000&QS=Staff&OEX=ISO-8859-1&OEH=ISO-8859-1)
5. Gostin LO. Law, Ethics, and Public Health in the Vaccination Debates: Politics of the Measles Outbreak. *JAMA*. 2015 Mar 17;313(11):1099–100.
6. Opel DJ, Omer SB. Measles, Mandates, and Making Vaccination the Default Option. *JAMA Pediatr*. 2015 Apr 1;169(4):303–4.
7. Blank NR, Caplan AL, Constable C. Exempting Schoolchildren From Immunizations: States With Few Barriers Had Highest Rates Of Nonmedical Exemptions. *Health Aff (Millwood)*. 2013 Jul 1;32(7):1282–90.
8. Davis MM, Gaglia MA. Associations of daycare and school entry vaccination requirements with varicella immunization rates. *Vaccine*. 2005 Apr 27;23(23):3053–60.
9. Omer SB, Pan WKY, Halsey NA, Stokley S, Moulton LH, Navar AM, et al. Nonmedical exemptions to school immunization requirements: secular trends and association of state policies with pertussis incidence. *JAMA*. 2006 Oct 11;296(14):1757–63.
10. Omer SB, Richards JL, Ward M, Bednarczyk RA. Vaccination Policies and Rates of Exemption from Immunization, 2005–2011. *N Engl J Med*. 2012 Sep 20;367(12):1170–1.
11. Pride KR, Geissler AL, Kolasa MS, Robinson B, Van Houten C, McClinton R, et al. Assessment of vaccine exemptions among Wyoming school children, 2009 and 2011. *J Sch Nurs Off Publ Natl Assoc Sch Nurses*. 2014 Oct;30(5):332–9.
12. Thompson JW, Tyson S, Card-Higginson P, Jacobs RF, Wheeler JG, Simpson P, et al. Impact of addition of philosophical exemptions on childhood immunization rates. *Am J Prev Med*. 2007 Mar;32(3):194–201.
13. Yang YT, Debold V. A longitudinal analysis of the effect of nonmedical exemption law and vaccine uptake on vaccine-targeted disease rates. *Am J Public Health*. 2014 Feb;104(2):371–7.
14. Community Preventive Services Task Force. Vaccination Programs: Requirements for Child Care, School, and College Attendance [Internet]. Washington, DC: US Department of Health and Human Services; 2016 Mar [cited 2018 Oct 22]. Available from:

- 1  
2  
3  
4 <https://www.thecommunityguide.org/findings/vaccination-programs-requirements-child-care-school-and-college-attendance>  
5  
6  
7  
8  
9  
10  
11  
12  
13  
14  
15  
16  
17  
18  
19  
20  
21  
22  
23  
24  
25  
26  
27  
28  
29  
30  
31  
32  
33  
34  
35  
36  
37  
38  
39  
40  
41  
42  
43  
44  
45  
46  
47  
48  
49  
50  
51  
52  
53  
54  
55  
56  
57  
58  
59  
60
15. Liberati A, Altman DG, Tetzlaff J, Mulrow C, Gøtzsche PC, Ioannidis JPA, et al. The PRISMA Statement for Reporting Systematic Reviews and Meta-Analyses of Studies That Evaluate Health Care Interventions: Explanation and Elaboration. *PLoS Med*. 2009 Jul 21;6(7):e1000100.
  16. Sterne JA, Hernán MA, Reeves BC, Savović J, Berkman ND, Viswanathan M, et al. ROBINS-I: a tool for assessing risk of bias in non-randomised studies of interventions. *BMJ*. 2016 Oct 12;355:i4919.
  17. Bugenske E, Stokley S, Kennedy A, Dorell C. Middle school vaccination requirements and adolescent vaccination coverage. *Pediatrics*. 2012 Jun;129(6):1056–63.
  18. Perkins RB, Lin M, Wallington SF, Hanchate AD. Impact of school-entry and education mandates by states on HPV vaccination coverage: Analysis of the 2009–2013 National Immunization Survey-Teen. *Hum Vaccines Immunother*. 2016 May 6;12(6):1615–22.
  19. Cuff RD, Buchanan T, Pelkofski E, Korte J, Modesitt SP, Pierce JY. Rates of human papillomavirus vaccine uptake amongst girls five years after introduction of statewide mandate in Virginia. *Am J Obstet Gynecol*. 2016;214(6):752.e1-6.
  20. Morita JY, Ramirez E, Trick WE. Effect of a school-entry vaccination requirement on racial and ethnic disparities in hepatitis B immunization coverage levels among public school students. *Pediatrics*. 2008 Mar;121(3):e547-552.
  21. Potter RC, DeVita SF, Vranesich PA, Boulton ML. Adolescent immunization coverage and implementation of new school requirements in Michigan, 2010. *Am J Public Health*. 2014 Aug;104(8):1526–33.
  22. Omer SB, Allen K, Chang DH, Guterman LB, Bednarczyk RA, Jordan A, et al. Exemptions From Mandatory Immunization After Legally Mandated Parental Counseling. *Pediatrics*. 2017 Dec 18;e20172364.
  23. Simpson JE, Hills RA, Allwes D, Rasmussen L. Uptake of Meningococcal Vaccine in Arizona Schoolchildren After Implementation of School-Entry Immunization Requirements. *Public Health Rep*. 2013;128(1):37–45.
  24. Thompson SC, Goudey RE, Stewart T. Legislation for school entry immunisation certificates in Victoria. *Aust J Public Health*. 1994 Sep;18(3):261–6.
  25. Colgrove J, Abiola S, Mello MM. HPV Vaccination Mandates — Lawmaking amid Political and Scientific Controversy. *N Engl J Med*. 2010 Aug 19;363(8):785–91.
  26. Shah S, Raman S, Moreira C, MacIntyre CR. School immunisation certificates--a review over time in a disadvantaged community. *Aust N Z J Public Health*. 2001 Dec;25(6):534–8.



- 1
  - 2
  - 3
  - 4
  - 5
  - 6
  - 7
  - 8
  - 9
  - 10
  - 11
  - 12
  - 13
  - 14
  - 15
  - 16
  - 17
  - 18
  - 19
  - 20
  - 21
  - 22
  - 23
  - 24
  - 25
  - 26
  - 27
  - 28
  - 29
  - 30
  - 31
  - 32
  - 33
  - 34
  - 35
  - 36
  - 37
  - 38
  - 39
  - 40
  - 41
  - 42
  - 43
  - 44
  - 45
  - 46
  - 47
  - 48
  - 49
  - 50
  - 51
  - 52
  - 53
  - 54
  - 55
  - 56
  - 57
  - 58
  - 59
  - 60
27. Miksevicius H, Johnson P, Watt PD. Limitations of school entry immunization certificates. *J Paediatr Child Health*. 1997 Oct;33(5):439–43.
28. Goldstein ND, Suder JS, Bendistis BE. The Politics of Eliminating Nonmedical Vaccination Exemptions. *Pediatrics*. 2017 Mar 1;139(3):e20164248.
29. Silverman RD, Hensel WF. Squaring State Child Vaccine Policy With Individual Rights Under the Individuals With Disabilities Education Act: Questions Raised in California. *Public Health Rep*. 2017 Sep 1;132(5):593–6.
30. Delamater PL, Leslie TF, Yang YT. Change in Medical Exemptions From Immunization in California After Elimination of Personal Belief Exemptions. *JAMA*. 2017 Sep 5;318(9):863–4.
31. Opel DJ, Schwartz JL, Omer SB, Silverman R, Duchin J, Kodish E, et al. Achieving an Optimal Childhood Vaccine Policy. *JAMA Pediatr*. 2017 Sep 1;171(9):893–6.
32. Giubilini A. Italy has introduced mandatory vaccinations – other countries should follow its lead [Internet]. *The Conversation*. [cited 2018 Jan 13]. Available from: <http://theconversation.com/italy-has-introduced-mandatory-vaccinations-other-countries-should-follow-its-lead-78576>
33. Born K, Yiu V, Sullivan T. Provinces divided over mandatory vaccination for school children [Internet]. *healthydebate.ca*. [cited 2015 Dec 18]. Available from: <http://healthydebate.ca/2014/05/topic/health-promotion-disease-prevention/mandatory-school-entry-vaccinations>
34. Kirby T. No jab, no play: Australia and compulsory vaccination. *Lancet Infect Dis*. 2017 Sep 1;17(9):903.
35. Ward JK, Colgrove J, Verger P. France’s risky vaccine mandates. *Science*. 2017 27;358(6362):458–9.
36. Yang YT, Studdert DM. Linking Immunization Status and Eligibility for Welfare and Benefits Payments: The Australian “No Jab, No Pay” Legislation. *JAMA*. 2017 Feb 28;317(8):803–4.
37. Leask J, Danchin M. Imposing penalties for vaccine rejection requires strong scrutiny. *J Paediatr Child Health*. 2017 May 1;53(5):439–44.
38. Paterlini M. Italy suspends mandatory vaccination of nursery children after Senate vote. *BMJ*. 2018 Aug 13;362:k3506.

**Figure 1. Inclusion and Exclusion Criteria**

| <b>Included</b>                                                                                                                   | <b>Excluded</b>                                                                                              |
|-----------------------------------------------------------------------------------------------------------------------------------|--------------------------------------------------------------------------------------------------------------|
| Language: English, French, or Spanish                                                                                             | Other languages                                                                                              |
| Publication date: 1980-2017                                                                                                       | Publication date before 1980                                                                                 |
| Population: any general pediatric population, including adolescent populations                                                    | Adult or mixed adult-pediatric populations, specific populations (e.g., those with a disease, in hospital)   |
| Intervention: any government-imposed general mandate for documentation and/or vaccination, with or without education requirements | Interventions imposed by individual schools, mandates that only come into effect in case of disease outbreak |
| Comparator: same-time comparators in locations without mandate changes or pre/post intervention comparisons                       | No comparator                                                                                                |
| Outcomes: childhood vaccination coverage in the population                                                                        | Outcomes such as disease occurrence, policy exemptions                                                       |
| Study methods: Any empirical method, qualitative or quantitative                                                                  | Non-empirical methods (e.g., theory, commentary, projected modeling)                                         |

Figure 2. PRISMA Flow Diagram

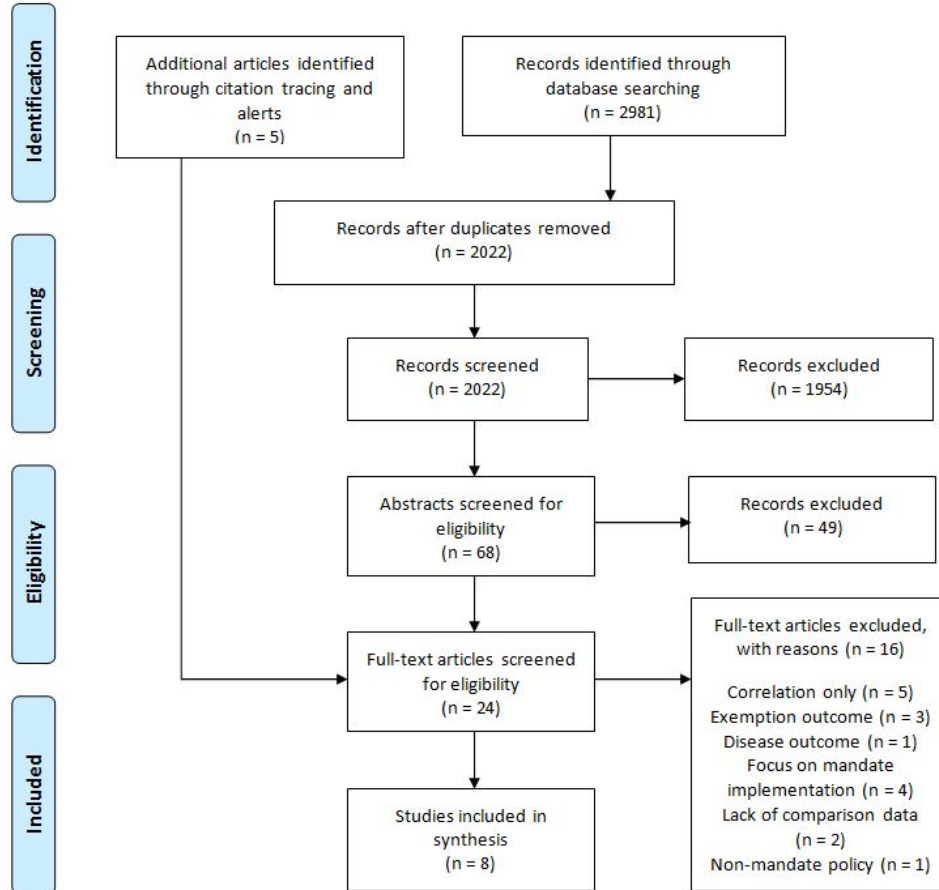

Table. Included Studies

| Lead Author | Date | Journal    | Method                                                     | Setting   | Data source (population)                                                          | Mandate studied (year)                        | Exemptions | Outcome of interest                                                                                                                     | Main Findings                                                                                                                                                                                                                                                                                                                                                                                                                                                                                                                                                                    | Limitations                                                                                                                                                                                                                                                                                                                                                                                                                                                                                                                                                                                                                                                                                                                                      |
|-------------|------|------------|------------------------------------------------------------|-----------|-----------------------------------------------------------------------------------|-----------------------------------------------|------------|-----------------------------------------------------------------------------------------------------------------------------------------|----------------------------------------------------------------------------------------------------------------------------------------------------------------------------------------------------------------------------------------------------------------------------------------------------------------------------------------------------------------------------------------------------------------------------------------------------------------------------------------------------------------------------------------------------------------------------------|--------------------------------------------------------------------------------------------------------------------------------------------------------------------------------------------------------------------------------------------------------------------------------------------------------------------------------------------------------------------------------------------------------------------------------------------------------------------------------------------------------------------------------------------------------------------------------------------------------------------------------------------------------------------------------------------------------------------------------------------------|
| Bugenske    | 2012 | Pediatrics | Retrospective analysis of vaccination coverage survey data | US states | 2008-2009 National Immunization Survey-Teen<br><br>(2008 n=17,835; 2009 n=20,066) | Middle school vaccination mandate (2008-2009) | Various    | Increase in coverage of 1) Tdap, HPV and MenACWY vaccines and 2) increase of all recommended vaccines in adolescents 13-17 years of age | <p>Tdap and MenACWY coverage increased from 2008 to 2009 in all states.</p> <p>States with existing or new mandates had significantly higher coverage of Tdap and MenACWY than states without mandates. But coverage did not differ among states with new and old mandates.</p> <p>HPV and MenACWY coverage did not differ in states with educational requirements compared to states without educational requirements (no states had educational requirements for Tdap).</p> <p>Presence of vaccine mandates were not associated with increase in all recommended vaccines.</p> | <p>Survey population was limited to land-line telephones and may not be representative.</p> <p>Vaccine coverage may be underestimated in the survey data used for the analysis, as NIS-Teen uses a combination of parent report and parent-referred health care provider report and only included respondents with adequate vaccination history information.</p> <p>Sample size for HPV and MenACWY mandates was small.</p> <p>Follow-up time for policies was limited.</p> <p>Policies were grouped together, not allowing for subtle differences in implementation or context.</p> <p>Ecological analysis: increase or decrease in coverage may be due to factors other than the mandate.</p> <p>Vaccine up-to-date was defined as 1 dose.</p> |

|         |      |                                             |                                                                         |                        |                                                                                                                |                                                                                                                                                                                                         |                                                           |                                                                                                                         |                                                                                                                                                                                                                     |                                                                                                                                                                                                                                                                                            |
|---------|------|---------------------------------------------|-------------------------------------------------------------------------|------------------------|----------------------------------------------------------------------------------------------------------------|---------------------------------------------------------------------------------------------------------------------------------------------------------------------------------------------------------|-----------------------------------------------------------|-------------------------------------------------------------------------------------------------------------------------|---------------------------------------------------------------------------------------------------------------------------------------------------------------------------------------------------------------------|--------------------------------------------------------------------------------------------------------------------------------------------------------------------------------------------------------------------------------------------------------------------------------------------|
| Cuff    | 2016 | American Journal of Obstetrics & Gynecology | Prospective cohort study using administrative data and telephone survey | Virginia, USA          | University of Virginia clinical data repository<br>(n=908 girls)                                               | 6 <sup>th</sup> grade HPV mandate for girls (2009)                                                                                                                                                      | Low barrier to obtain philosophical exemptions            | HPV vaccine initiation ( $\geq 1$ dose) in girls 11-12 years of age and proportion vaccinated in 2009 and 2014 cohorts. | State school entry mandate had no effect on HPV coverage 5 years after mandate implementation.                                                                                                                      | Only 1 year of baseline (pre-mandate) data.<br><br>Single-center study.<br><br>Participants included only parents seeking care for well-child care visits. May not be representative.                                                                                                      |
| Morita  | 2008 | Pediatrics                                  | Retrospective cohort study using administrative data                    | Chicago, Illinois, USA | Chicago public schools' vaccination database<br>(n=106,541 students total; with 14,950 to 19,703 in each year) | 5 <sup>th</sup> grade HBV mandate (1997)                                                                                                                                                                | Medical or religious exemptions permitted                 | HBV coverage by grade 12 (overall, and racial/ethnic disparities in coverage)                                           | Postmandate cohorts had significantly higher HBV coverage rates.<br><br>Coverage rate disparities by race and ethnicity also decreased post-mandate.                                                                | Ecological analysis: Likely inconsistent enforcement of policy, not captured by study data collection methods.<br><br>Potential outcome bias: Losses to follow up (i.e.: students who left school before grade 12) excluded from the analysis.<br><br>Only two years of post-mandate data. |
| Omer    | 2017 | Pediatrics                                  | Retrospective cohort study using administrative data                    | Washington, USA        | Washington State Department of Health 1997-98 – 2013-14<br>(number of students not reported)                   | Parents seeking exemption from any school vaccine mandates must submit certificate signed by a licensed health care provider indicating discussion of benefits and risks of vaccination occurred (2011) | Medical, personal, or religious (with signed certificate) | Kindergarten vaccination rates, exemption rates and clustering of vaccine exemptions                                    | Vaccination rates stayed the same or increased after the policy. Exemption rates decreased. Non-compliance increased.<br><br>Probability of a kindergartener interacting with an exempted kindergartener decreased. | Ecological analysis: Other changes (e.g., in vaccine schedule, exemption forms) prior to the policy change appear to have had impact on trends.<br><br>Home learners may not be included in this data (selection bias).                                                                    |
| Perkins | 2016 | Human Vaccines & Immunotherapeutics         | Retrospective analysis of vaccination coverage survey data              | Various US States      | National Immunization Survey-Teen 2009-2013                                                                    | HPV mandate for girls (DC, VA)<br><br>HPV education                                                                                                                                                     | Low barrier to obtain philosophical exemptions to mandate | HPV vaccine coverage (series initiation, completion) in girls.                                                          | No difference in HPV vaccination coverage between girls in states with and without                                                                                                                                  | Vaccine coverage may be underestimated in the survey data used for the analysis, as NIS-                                                                                                                                                                                                   |

1  
2  
3  
4  
5  
6  
7  
8  
9  
10  
11  
12  
13  
14  
15  
16  
17  
18  
19  
20  
21  
22  
23  
24  
25  
26  
27  
28  
29  
30  
31  
32  
33  
34  
35  
36  
37  
38  
39  
40  
41  
42  
43  
44  
45  
46  
47

|         |      |                                   |                                                   |               |                                                                                                                        |                                                             |                                                |                                                                                                                                                                     |                                                                                        |                                                                                                                                                                                                                                                                                                                                                                                                                                                     |
|---------|------|-----------------------------------|---------------------------------------------------|---------------|------------------------------------------------------------------------------------------------------------------------|-------------------------------------------------------------|------------------------------------------------|---------------------------------------------------------------------------------------------------------------------------------------------------------------------|----------------------------------------------------------------------------------------|-----------------------------------------------------------------------------------------------------------------------------------------------------------------------------------------------------------------------------------------------------------------------------------------------------------------------------------------------------------------------------------------------------------------------------------------------------|
|         |      |                                   |                                                   |               | (n = 47,845, with 1,649 in vaccine mandate jurisdictions and 12,579 in education mandate states)                       | mandate (LA, MI, CO, IN, IA, IL, NJ, NC, TX, WA)            |                                                |                                                                                                                                                                     | education or school entry mandates.                                                    | <p>Teen uses a combination of parent report and parent-referred health care provider report and only included respondents with adequate vaccination history information.</p> <p>Only 1 year of baseline (pre-mandate) data.</p> <p>Policies were grouped together, not allowing for subtle differences in implementation or context.</p> <p>Ecological analysis: increase or decrease in coverage may be due to factors other than the mandate.</p> |
| Potter  | 2014 | American Journal of Public Health | Retrospective cohort study of administrative data | Michigan, USA | Michigan Care Improvement Registry (statewide immunization registry) 2009-2010<br><br>(2009 n=133,738; 2010 n=131,051) | New mandate at grade 6 entry for TDaP, MCV4, varicella      | Low barrier to obtain philosophical exemptions | Completion of all required vaccines (as a single variable); time to completion (up-to-date status) of all required vaccines; initiation of HPV vaccine (girls only) | Vaccine completion was higher in post-mandate year and time to completion was shorter. | <p>Ecological analysis: increase in coverage may be due in part to factors other than the mandate.</p> <p>Only 1 year of baseline (pre-mandate) and one year of follow up (post-mandate) data.</p> <p>Home learners may not be included in this data (selection bias).</p> <p>Losses to follow-up (i.e. children who moved out of state) were included.</p>                                                                                         |
| Simpson | 2013 | Public Health Reports             | Retrospective cohort study of administrative data | Arizona, USA  | Arizona State Immunization Information System                                                                          | New mandate for MCV4 for grade 6 entry if 11 years or older | Medical and religious/philosophical            | MCV4 coverage                                                                                                                                                       | Vaccine coverage for 12-year-olds was higher in postmandate years than before          | Ecological analysis: increase in coverage may be due in part to factors other than the mandate, for example                                                                                                                                                                                                                                                                                                                                         |

|          |      |                                     |                                                   |               |                                                                                                                                                                    |                                         |                                                                      |                                                                                                              |                                                                                                                                                                                                                                                 |                                                                                                                                                                                                                                                                                                                                              |
|----------|------|-------------------------------------|---------------------------------------------------|---------------|--------------------------------------------------------------------------------------------------------------------------------------------------------------------|-----------------------------------------|----------------------------------------------------------------------|--------------------------------------------------------------------------------------------------------------|-------------------------------------------------------------------------------------------------------------------------------------------------------------------------------------------------------------------------------------------------|----------------------------------------------------------------------------------------------------------------------------------------------------------------------------------------------------------------------------------------------------------------------------------------------------------------------------------------------|
|          |      |                                     |                                                   |               | (n=954,953 records)                                                                                                                                                |                                         |                                                                      |                                                                                                              | mandate.                                                                                                                                                                                                                                        | the 2005 ACIP recommendation and education/awareness campaign that accompanied the mandate.<br><br>Comparison with census data indicates that the registry possibly underestimated coverage.                                                                                                                                                 |
| Thompson | 1994 | Australian Journal of Public Health | Retrospective cohort study of administrative data | Victoria, AUS | Victoria Directorate of School Education mid-year census 1991 (kindergarten), 1992 (kindergarten)<br><br>(1576 schools included; 1992 n=45,049 student enrolments) | Documentation mandate for school entry. | No exemptions to required documentation for public school enrolment. | Submitted documentation of immunization status; documentation of complete (up-to-date) immunization for age. | There was a small increase in submitted documentation following policy mandate.<br><br>This included a small increase in documentation of fully immunized students, and a larger increase in documentation of incompletely vaccinated students. | Selection bias: data not available from non-governmental schools. Only schools with kindergarten enrollment included.<br><br>Not possible to know reason for missing documentation, therefore unclear whether this presents bias in coverage outcome. Indications some schools more compliant than others.<br><br>Limited pre and post data. |

## Appendix A: Search Strategy Detail

**Database:** MEDLINE(R) In-Process & Other Non-Indexed Citations and MEDLINE(R) 1946 to Present (Ovid)

**Search:** (((vaccin\* OR inocul\* OR immunis\* OR immuniz\*) OR exp immunization/ OR exp immunization programs/ OR exp vaccines/) AND ((law\* OR regulat\* OR legal\* OR polic\* OR mandate\* OR requir\* OR compliance OR uptake OR enforce\* OR compulsory) OR Jurisprudence/ OR Informed Consent/ OR Parental Consent/ OR Coercion/ OR Behavior Control/ OR Mandatory Programs/ OR Voluntary Programs/ OR Public Policy/ OR Health Policy/ OR Legislation/ OR Guideline Adherence/) AND (school\* OR college\* OR universit\* OR postsecondar\* ) AND (parent\* OR guardian\*)) OR (Immunization/legislation & jurisprudence AND Schools)  
Limit Date to 1980-2017

**Results:** 613

**Database:** EMBASE (Excerpta Medica) (Ovid)

**Search:** ((vaccin\* OR inocul\* OR immunis\* OR immuniz\*) OR exp immunization/ OR Preventive Health Service/ OR exp Vaccine) AND ((law\* OR regulat\* OR legal\* OR polic\* OR mandate\* OR requir\* OR compliance OR uptake OR enforce\* OR compulsory) OR Jurisprudence/ OR Informed Consent/ OR Mandatory Program/ OR Voluntary Program/ OR Policy/ OR Health Care Policy/ OR Law/ OR Parental Consent/ OR Persuasive Communication/ OR Behavior Control/ OR Parental Attitude/ OR Public Opinion/) AND ((school\* OR college\* OR universit\* OR postsecondar\* OR day-care\* or day care\* OR daycare\*) OR exp School/ OR School Health Service/ OR Day Care/) AND ((parent\* OR guardian\*) OR exp Parent/ OR Legal Guardian/)  
Limit Date to 1980-2017

**Results:** 1272

**Database:** CINAHL (Cumulative Index to Nursing and Allied Health Literature) 1982-present (EBSCOhost)

**Search:** ((vaccin\* OR inocul\* OR immunis\* OR immuniz\*) OR MH "Immunization+" OR MH "Vaccines+") AND ((law\* OR regulat\* OR legal\* OR polic\* OR mandate\* OR requir\* OR compliance OR uptake OR enforce\* OR compulsory) OR MH "Parental Attitudes+" OR MH "Jurisprudence" OR MH "Consent" OR MH "Public Policy+" OR MH "Legislation" OR MH "Coercion" OR MH "Public Opinion") AND ((school\* OR college\* OR universit\* OR postsecondar\* OR day-care\* or day care\* OR daycare\*) OR MH "Schools+" OR MH "School Health Services" OR MH "Child Day Care") AND ((parent\* OR guardian\*) OR MH "Parents+" OR MH "Guardianship, Legal")



1  
2  
3 Limit Date to 1980-2017

4  
5 **Results:** 288

6  
7  
8  
9 **Database:** EconLit (EBSCOhost)

10  
11 **Search:** ((ZU "state and local government: health; education; welfare; public pensions") or (ZU  
12 "health behavior") or (ZU "health, education, and welfare: general") or (ZU "health: general") or  
13 (ZU "health: government policy; regulation; public health") or (ZU "health: other") or (ZU  
14 "policy objectives; policy designs and consistency; policy coordination") or (ZU "public  
15 health")) AND (school\* OR college\* OR universit\* OR postsecondar\* OR day-care\* OR day  
16 care\* OR daycare\*) AND (vaccin\* OR inocul\* OR immunis\* OR immuniz\*) AND (law\* OR  
17 regulat\* OR legal\* OR mandate\* OR requir\* OR compliance OR uptake OR enforce\* OR  
18 compulsory)

19  
20 Limit Date to 1980-2017

21  
22 **Results:** 72

23  
24  
25  
26 **Database:** Education Resources Information Center (ERIC) (EBSCOhost)

27  
28 **Search:** ((vaccin\* OR inocul\* OR immunis\* OR immuniz\*) OR (SU.EXACT("Immunization  
29 Programs"))) AND ((law\* OR regulat\* OR legal\* OR polic\* OR mandate\* OR requir\* OR  
30 compliance OR uptake OR enforce\* OR compulsory) OR (SU.EXACT("School Law") OR  
31 SU.EXACT("Laws") OR SU.EXACT("Informed Consent") OR SU.EXACT("Legislation") OR  
32 SU.EXACT("Health Behavior") OR SU.EXACT("Health Programs") OR SU.EXACT("Public  
33 Policy") OR SU.EXACT("Parents") OR SU.EXACT("Parent Rights") OR SU.EXACT("Parent  
34 Attitudes") OR SU.EXACT("Parent Responsibility") OR SU.EXACT("Child Health"))) AND  
35 ((school\* OR college\* OR universit\* OR postsecondar\* OR day-care\* or day care\* OR  
36 daycare\*) OR (SU.EXACT.EXPLODE("Schools") OR SU.EXACT("Universities") OR  
37 SU.EXACT("Colleges") OR SU.EXACT("Postsecondary Education") OR SU.EXACT("Child  
38 Care Centers"))) AND ((parent\* OR guardian\*) OR (SU.EXACT.EXPLODE("Parents")))

39  
40 Limit Date to 1980-2017

41  
42  
43 **Results:** 251

44  
45  
46  
47 **Database:** PAIS Index (PAIS International and PAIS Archive) (ProQuest)

48  
49 **Search:** (school\* OR college\* OR universit\* OR postsecondar\* OR day-care\* OR day care\* OR  
50 daycare\*) AND (vaccin\* OR inocul\* OR immunis\* OR immuniz\* OR  
51 SU.EXACT("Vaccination and Vaccines") OR SU.EXACT("Epidemiology") OR  
52 SU.EXACT("Prevention") OR SU.EXACT("Intervention")) AND (parent\* OR guardian\* OR  
53 SU.EXACT("Fathers" OR "Homosexual Parents" OR "Mothers" OR "Parents" OR "Single  
54 Fathers" OR "Single Mothers" OR "Surrogate Parents" OR "Working Mothers")) AND (law\*  
55 OR regulat\* OR legal\* OR mandate\* OR requir\* OR compliance OR uptake OR enforce\* OR  
56  
57

1  
2  
3 compulsory OR SU.EXACT("Legislation") OR SU.EXACT("Informed Consent") OR  
4 SU.EXACT("Jurisprudence") OR SU.EXACT("Health Behavior") OR SU.EXACT("Parental  
5 Attitudes") OR SU.EXACT("Coercion") OR SU.EXACT("Health Care Services Policy") OR  
6 SU.EXACT("Health Policy") OR SU.EXACT("Compulsory Participation") OR  
7 SU.EXACT("Law") OR SU.EXACT("Regulation"))  
8  
9 Limit Date to 1980-2017  
10

11 **Results:** 165  
12  
13  
14

15 **The following databases were also searched preliminarily, but due to lack of relevant,**  
16 **includable results were not included in the review:** Campbell Collaboration, Cochrane  
17 Databases of Systematic Reviews, EPPI-Centre: DoPHER, Networked Digital Library of These  
18 and Dissertations (NDLTD), Proquest Dissertation and Theses Global, World Political Science  
19 Abstracts.  
20  
21  
22  
23  
24  
25  
26  
27  
28  
29  
30  
31  
32  
33  
34  
35  
36  
37  
38  
39  
40  
41  
42  
43  
44  
45  
46  
47  
48  
49  
50  
51  
52  
53  
54  
55  
56  
57  
58  
59  
60

Confidential

## Appendix B: Data Extraction Fields

### Publication Metadata Summary

- M1. Lead author
- M2. Date of publication
- M3. Title
- M4. What does the study do?

### Mandate Policy Attributes

- QP1. When was this policy implemented (year)?
- QP2. Is this a new mandate or a modification of a previous mandate?
  - a. New
  - b. Modification to add vaccine(s)
  - c. Modification to change exemption procedures
  - d. Modification of other type:
  - e. [blank field to allow for input of other]
- QP3. What vaccine(s) are regulated by the policy?
  - a. All recommended
  - b. HepB
  - c. Hib
  - d. HPV
  - e. Influenza
  - f. Meningococcal (any)
  - g. Measles only
  - h. MMR
  - i. Pneumococcal
  - j. Polio
  - k. Rotavirus
  - l. TDaP/DTaP
  - m. Varicella
  - n. Other
  - o. [blank field to allow for input of other]
- QP4. What population is targeted by the policy?
  - a. Day Care Students (pre-K)
  - b. K-12 Students
  - c. Postsecondary
  - d. Other
  - e. [blank field to allow for input of other]
- QP5. Who is the administrator of the policy?
  - a. Federal Government
  - b. Provincial/State Government
  - c. Regional Health Entity
  - d. School
  - e. Other
  - f. [blank field to allow for input of other]
- QP6. For whom are there consequences if the policy is not complied with/met?
  - a. Government Body
  - b. School
  - c. Parents
  - d. No one
  - e. Other

- 1  
2  
3 f. [blank field to allow for input of other]  
4 QP7. What type of consequences are applied for non-compliance?  
5 a. Financial  
6 b. Legal  
7 c. School/daycare conditional enrolment  
8 d. School/daycare enrolment banned  
9 e. Other  
10 f. [blank field to allow for input of other]  
11 QP8. Are there exemptions allowed from the policy?  
12 a. No  
13 b. Yes – unspecified  
14 c. Yes – medical  
15 d. Yes – religious  
16 e. Yes – philosophical  
17 f. Yes – for homeless/military/transient populations  
18 g. Yes – other:  
19 h [blank field to allow for input of other]  
20 QP9. What is needed for exemption?  
21 a. Self-report  
22 b. Authorization: non-medical  
23 c. Authorization: health professional  
24 d. Education  
25 e. Nothing  
26 f. Other  
27 g. [blank field to allow for input of other]  
28 QP10. Who has the power to authorize exemptions?  
29 a. Governmental body  
30 b. School  
31 c. Doctor  
32 d. Other  
33 e. [blank field to allow for input of other]  
34 QP11. How often to exemptions need to be resubmitted/reauthorized?  
35 a. Never  
36 b. Annually  
37 c. Other  
38 d. [blank field to allow for input of other]  
39 QP12. Did immunization rates rise following implementation of this policy?  
40 a. No  
41 b. Inconclusive  
42 c. Yes  
43 d. Other  
44 e. [blank field to allow for input of other]  
45 QP13. What other measures were implemented with this policy?  
46 a. Improved immunization coverage (e.g., free, reduced cost vaccines)  
47 b. Improved immunization access (e.g., additional clinics, providers)  
48 c. Other  
49 d. [blank field to allow for input of other]  
50 e. None known  
51 QP14. Has Other Research Been Done on the Policy?  
52 a. Yes  
53 b. None known  
54  
55  
56  
57  
58  
59  
60

1  
2  
3 Study Attributes

4 RQ1. Lead author

- 5 a. Institution  
6 b. Country  
7 c. Discipline (of primary appointment)

8 RQ2. Research Method

- 9 a. Quant: Survey/Questionnaire  
10 b. Quant: Descriptive statistical methods (e.g., simple associations)  
11 c. Quant: Time series  
12 d. Quant: Before/after (with or without control)  
13 e. Quant: RCT  
14 f. Quant: statistical regression analysis (any type)  
15 g. Qual: Interviews  
16 h. Qual: Focus groups  
17 i. Qual: ethnographic  
18 j. Mixed-methods  
19 k. Other  
20 l. [blank field to allow for input of other]

21 RQ3. Study funding type

- 22 a. Public  
23 b. Private foundation  
24 c. Industry  
25 d. No funding  
26 e. Other:  
27 f. [blank field to allow for input of other]

28 RQ4. Major findings

29 [text box for brief free response]

30 RQ5. Major limitations/biases

31 [text box for brief free response]

Figure 1. Inclusion and exclusion criteria

| Included                                                                                                                          | Excluded                                                                                                     |
|-----------------------------------------------------------------------------------------------------------------------------------|--------------------------------------------------------------------------------------------------------------|
| Language: English, French, or Spanish                                                                                             | Other languages                                                                                              |
| Publication date: 1980-2017                                                                                                       | Publication date before 1980                                                                                 |
| Population: any general pediatric population, including adolescent populations                                                    | Adult or mixed adult-pediatric populations, specific populations (e.g., those with a disease, in hospital)   |
| Intervention: any government-imposed general mandate for documentation and/or vaccination, with or without education requirements | Interventions imposed by individual schools, mandates that only come into effect in case of disease outbreak |
| Comparator: same-time comparators in locations without mandate changes or pre/post intervention comparisons                       | No comparator                                                                                                |
| Outcomes: childhood vaccination coverage in the population                                                                        | Outcomes such as disease occurrence, policy exemptions                                                       |
| Study methods: Any empirical method, qualitative or quantitative                                                                  | Non-empirical methods (e.g., theory, commentary, projected modeling)                                         |

Confidential

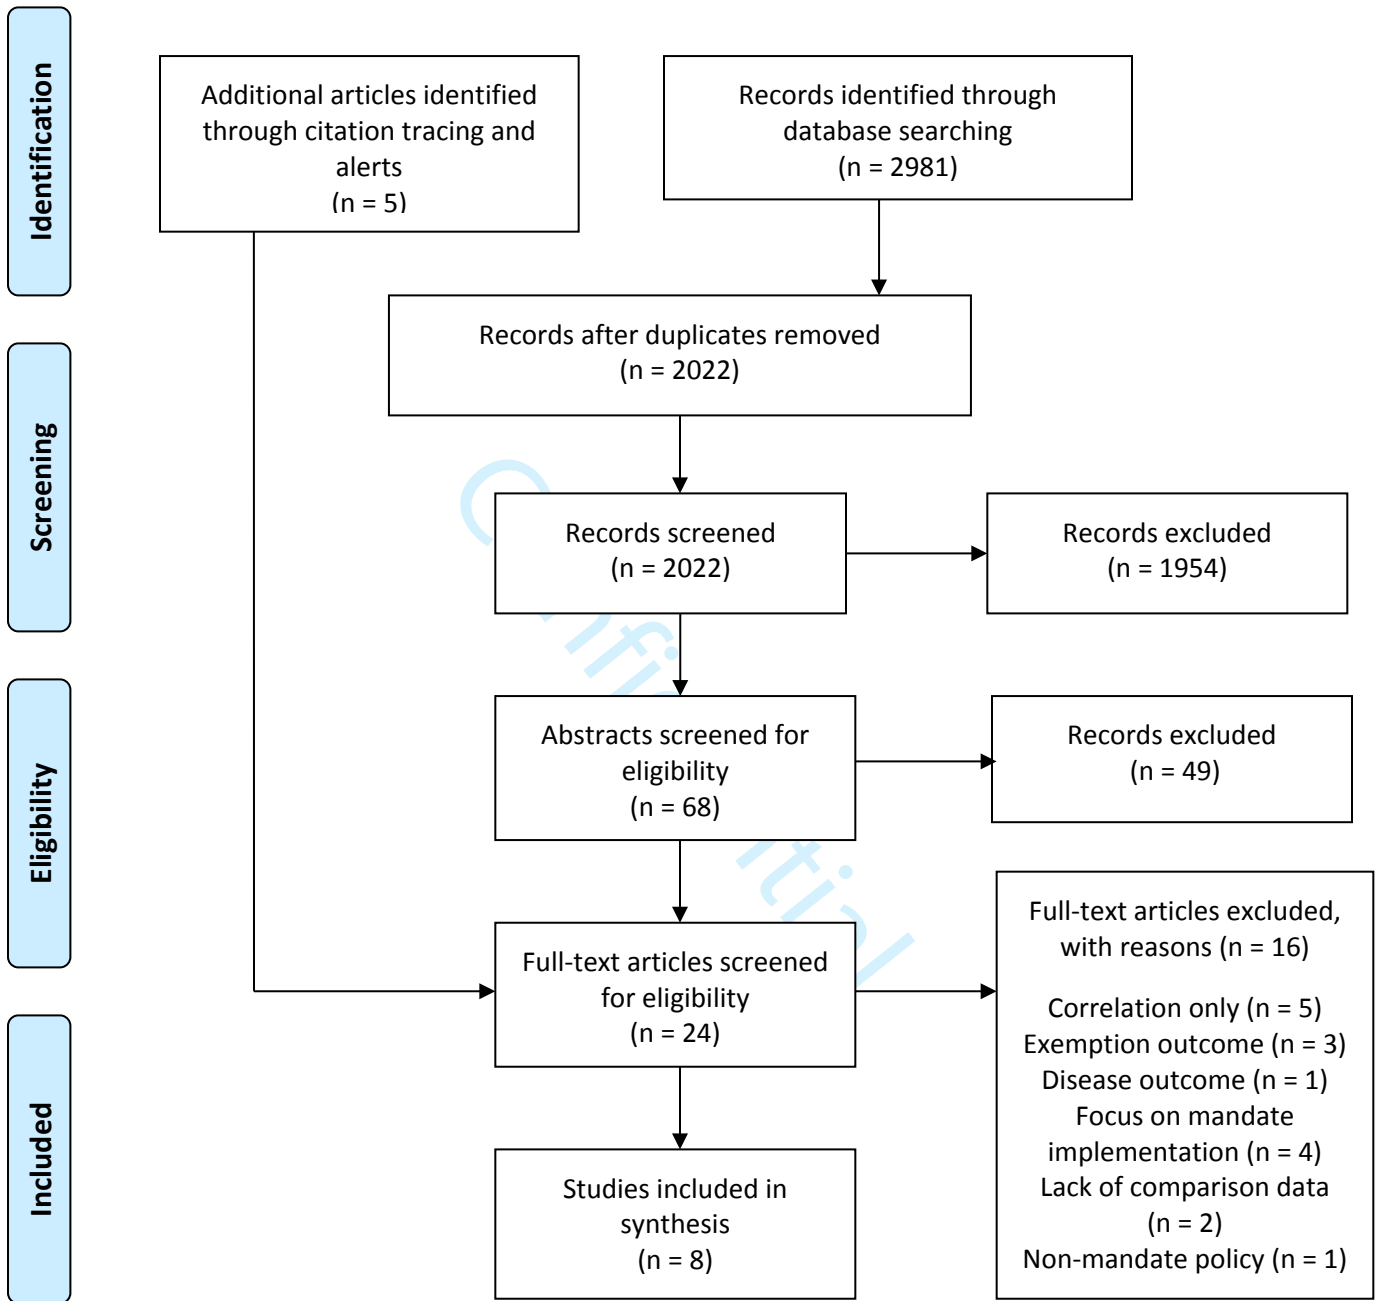

1  
2  
3  
4  
5  
6  
7  
8  
9  
10  
11  
12  
13  
14  
15  
16  
17  
18  
19  
20  
21  
22  
23  
24  
25  
26  
27  
28  
29  
30  
31  
32  
33  
34  
35  
36  
37  
38  
39  
40  
41  
42  
43  
44  
45  
46  
47

**Table 1. Included Studies**

| Lead Author | Date | Journal                                     | Method                                                                  | Setting       | Data source                                     | Mandate studied (year)                             | Exemptions                                     | Outcome of interest                                                                                                                     | Main Findings                                                                                                                                                                                                                                                                                                                                                                                                                                                                                                                                                                    | Limitations                                                                                                                                                                                                                                                                                                                                                                                                                                                                                                                                                                                                                                                                                                                                      |
|-------------|------|---------------------------------------------|-------------------------------------------------------------------------|---------------|-------------------------------------------------|----------------------------------------------------|------------------------------------------------|-----------------------------------------------------------------------------------------------------------------------------------------|----------------------------------------------------------------------------------------------------------------------------------------------------------------------------------------------------------------------------------------------------------------------------------------------------------------------------------------------------------------------------------------------------------------------------------------------------------------------------------------------------------------------------------------------------------------------------------|--------------------------------------------------------------------------------------------------------------------------------------------------------------------------------------------------------------------------------------------------------------------------------------------------------------------------------------------------------------------------------------------------------------------------------------------------------------------------------------------------------------------------------------------------------------------------------------------------------------------------------------------------------------------------------------------------------------------------------------------------|
| Bugenske    | 2012 | Pediatrics                                  | Retrospective analysis of vaccination coverage survey data              | US states     | 2008-2009 National Immunization Survey-Teen     | Middle school vaccination mandate (2008-2009)      | Various                                        | Increase in coverage of 1) Tdap, HPV and MenACWY vaccines and 2) increase of all recommended vaccines in adolescents 13-17 years of age | <p>Tdap and MenACWY coverage increased from 2008 to 2009 in all states.</p> <p>States with existing or new mandates had significantly higher coverage of Tdap and MenACWY than states without mandates. But coverage did not differ among states with new and old mandates.</p> <p>HPV and MenACWY coverage did not differ in states with educational requirements compared to states without educational requirements (no states had educational requirements for Tdap).</p> <p>Presence of vaccine mandates were not associated with increase in all recommended vaccines.</p> | <p>Survey population was limited to land-line telephones and may not be representative.</p> <p>Vaccine coverage may be underestimated in the survey data used for the analysis, as NIS-Teen uses a combination of parent report and parent-referred health care provider report and only included respondents with adequate vaccination history information.</p> <p>Sample size for HPV and MenACWY mandates was small.</p> <p>Follow-up time for policies was limited.</p> <p>Policies were grouped together, not allowing for subtle differences in implementation or context.</p> <p>Ecological analysis: increase or decrease in coverage may be due to factors other than the mandate.</p> <p>Vaccine up-to-date was defined as 1 dose.</p> |
| Cuff        | 2016 | American Journal of Obstetrics & Gynecology | Prospective cohort study using administrative data and telephone survey | Virginia, USA | University of Virginia clinical data repository | 6 <sup>th</sup> grade HPV mandate for girls (2009) | Low barrier to obtain philosophical exemptions | HPV vaccine initiation ( $\geq 1$ dose) in girls 11-12 years of age and proportion vaccinated in 2009 and 2014 cohorts.                 | <p>State school entry mandate had no effect on HPV coverage 5 years after mandate implementation.</p>                                                                                                                                                                                                                                                                                                                                                                                                                                                                            | <p>Only 1 year of baseline (pre-mandate) data.</p> <p>Single-center study.</p> <p>Participants included only parents seeking care for</p>                                                                                                                                                                                                                                                                                                                                                                                                                                                                                                                                                                                                        |



|         |      |                                     |                                                            |                        |                                                         |                                                                                                                                                                                                         |                                                           |                                                                                      |                                                                                                                                                                                                                     |                                                                                                                                                                                                                                                                                            |
|---------|------|-------------------------------------|------------------------------------------------------------|------------------------|---------------------------------------------------------|---------------------------------------------------------------------------------------------------------------------------------------------------------------------------------------------------------|-----------------------------------------------------------|--------------------------------------------------------------------------------------|---------------------------------------------------------------------------------------------------------------------------------------------------------------------------------------------------------------------|--------------------------------------------------------------------------------------------------------------------------------------------------------------------------------------------------------------------------------------------------------------------------------------------|
|         |      |                                     |                                                            |                        |                                                         |                                                                                                                                                                                                         |                                                           |                                                                                      |                                                                                                                                                                                                                     | well-child care visits. May not be representative.                                                                                                                                                                                                                                         |
| Morita  | 2008 | Pediatrics                          | Retrospective cohort study using administrative data       | Chicago, Illinois, USA | Chicago public schools' vaccination database            | 5 <sup>th</sup> grade HBV mandate (1997)                                                                                                                                                                | Medical or religious exemptions permitted                 | HBV coverage by grade 12 (overall, and racial/ethnic disparities in coverage)        | Postmandate cohorts had significantly higher HBV coverage rates.<br><br>Coverage rate disparities by race and ethnicity also decreased post-mandate.                                                                | Ecological analysis: Likely inconsistent enforcement of policy, not captured by study data collection methods.<br><br>Potential outcome bias: Losses to follow up (i.e.: students who left school before grade 12) excluded from the analysis.<br><br>Only two years of post-mandate data. |
| Omer    | 2017 | Pediatrics                          | Retrospective cohort study using administrative data       | Washington, USA        | Washington State Department of Health 1997-98 – 2013-14 | Parents seeking exemption from any school vaccine mandates must submit certificate signed by a licensed health care provider indicating discussion of benefits and risks of vaccination occurred (2011) | Medical, personal, or religious (with signed certificate) | Kindergarten vaccination rates, exemption rates and clustering of vaccine exemptions | Vaccination rates stayed the same or increased after the policy. Exemption rates decreased. Non-compliance increased.<br><br>Probability of a kindergartener interacting with an exempted kindergartener decreased. | Ecological analysis: Other changes (e.g., in vaccine schedule, exemption forms) prior to the policy change appear to have had impact on trends.<br><br>Home learners may not be included in this data (selection bias).                                                                    |
| Perkins | 2016 | Human Vaccines & Immunotherapeutics | Retrospective analysis of vaccination coverage survey data | US States              | National Immunization Survey-Teen 2009-2013             | HPV mandate for girls (DC, VA)<br><br>HPV education mandate (LA, MI, CO, IN, IA, IL, NJ, NC, TX, WA)                                                                                                    | Low barrier to obtain philosophical exemptions to mandate | HPV vaccine coverage (series initiation, completion) in girls.                       | No difference in HPV vaccination coverage between girls in states with and without education or school entry mandates.                                                                                              | Vaccine coverage may be underestimated in the survey data used for the analysis, as NIS-Teen uses a combination of parent report and parent-referred health care provider report and only included respondents with adequate vaccination history information.                              |

1  
2  
3  
4  
5  
6  
7  
8  
9  
10  
11  
12  
13  
14  
15  
16  
17  
18  
19  
20  
21  
22  
23  
24  
25  
26  
27  
28  
29  
30  
31  
32  
33  
34  
35  
36  
37  
38  
39  
40  
41  
42  
43  
44  
45  
46  
47

|          |      |                                     |                                                   |               |                                                                                |                                                             |                                                |                                                                                                                                                                     |                                                                                        |                                                                                                                                                                                                                                                                                                                                                             |
|----------|------|-------------------------------------|---------------------------------------------------|---------------|--------------------------------------------------------------------------------|-------------------------------------------------------------|------------------------------------------------|---------------------------------------------------------------------------------------------------------------------------------------------------------------------|----------------------------------------------------------------------------------------|-------------------------------------------------------------------------------------------------------------------------------------------------------------------------------------------------------------------------------------------------------------------------------------------------------------------------------------------------------------|
|          |      |                                     |                                                   |               |                                                                                |                                                             |                                                |                                                                                                                                                                     |                                                                                        | <p>Only 1 year of baseline (pre-mandate) data.</p> <p>Policies were grouped together, not allowing for subtle differences in implementation or context.</p> <p>Ecological analysis: increase or decrease in coverage may be due to factors other than the mandate.</p>                                                                                      |
| Potter   | 2014 | American Journal of Public Health   | Retrospective cohort study of administrative data | Michigan, USA | Michigan Care Improvement Registry (statewide immunization registry) 2009-2010 | New mandate at grade 6 entry for Tdap, MCV4, varicella      | Low barrier to obtain philosophical exemptions | Completion of all required vaccines (as a single variable); time to completion (up-to-date status) of all required vaccines; initiation of HPV vaccine (girls only) | Vaccine completion was higher in post-mandate year and time to completion was shorter. | <p>Ecological analysis: increase in coverage may be due in part to factors other than the mandate.</p> <p>Only 1 year of baseline (pre-mandate) and one year of follow up (post-mandate) data.</p> <p>Home learners may not be included in this data (selection bias).</p> <p>Losses to follow-up (i.e. children who moved out of state) were included.</p> |
| Simpson  | 2013 | Public Health Reports               | Retrospective cohort study of administrative data | Arizona, USA  | Arizona State Immunization Information System                                  | New mandate for MCV4 for grade 6 entry if 11 years or older | Medical and religious/philosophical            | MCV4 coverage                                                                                                                                                       | Vaccine coverage for 12-year-olds was higher in postmandate years than before mandate. | <p>Ecological analysis: increase in coverage may be due in part to factors other than the mandate, for example the 2005 ACIP recommendation and education/awareness campaign that accompanied the mandate.</p> <p>Comparison with census data indicates that the registry possibly underestimated coverage.</p>                                             |
| Thompson | 1994 | Australian Journal of Public Health | Retrospective cohort study of administrative data | Victoria, AUS | Victoria Directorate of School Education                                       | Documentation mandate for school                            | No exemptions to required documentation        | Submitted documentation of immunization status;                                                                                                                     | There was a small increase in submitted documentation following policy                 | Selection bias: data not available from non-governmental schools. Only schools with                                                                                                                                                                                                                                                                         |

1  
2  
3  
4  
5  
6  
7  
8  
9  
10  
11  
12  
13  
14  
15  
16  
17  
18  
19  
20  
21  
22  
23  
24  
25  
26  
27  
28  
29  
30  
31  
32  
33  
34  
35  
36  
37  
38  
39  
40  
41  
42  
43  
44  
45  
46  
47

|  |  |  |  |  |                                                          |        |                                 |                                                              |                                                                                                                                                                          |                                                                                                                                                                                                                                                          |
|--|--|--|--|--|----------------------------------------------------------|--------|---------------------------------|--------------------------------------------------------------|--------------------------------------------------------------------------------------------------------------------------------------------------------------------------|----------------------------------------------------------------------------------------------------------------------------------------------------------------------------------------------------------------------------------------------------------|
|  |  |  |  |  | mid-year census 1991 (kindergarten), 1992 (kindergarten) | entry. | on for public school enrolment. | documentation of complete (up-to-date) immunization for age. | mandate.<br><br>This included a small increase in documentation of fully immunized students, and a larger increase in documentation of incompletely vaccinated students. | kindergarten enrollment included.<br><br>Not possible to know reason for missing documentation, therefore unclear whether this presents bias in coverage outcome. Indications some schools more compliant than others.<br><br>Limited pre and post data. |
|--|--|--|--|--|----------------------------------------------------------|--------|---------------------------------|--------------------------------------------------------------|--------------------------------------------------------------------------------------------------------------------------------------------------------------------------|----------------------------------------------------------------------------------------------------------------------------------------------------------------------------------------------------------------------------------------------------------|

Confidential
